# Supplementary material for: Modified Bismuth Nanoparticles: A New Targeted Nanoprobe for Computed Tomography Imaging of Cancer
Source: PubMed Central journal article supplement — Cell J. 2022 Sep 12;24(9):515–21. doi: 10.22074/cellj.2022.8348 (PMC9588159; doi:10.22074/cellj.2022.8348), 2022-09-12
Supplement: Cell-J-24-515-s01.pdf [file Cell-J-24-515-s01.pdf]

## Supplementary Information for

# Modified Bismuth Nanoparticles: A New Targeted Nanoprobe for CT Imaging of Cancer

Milad Mohammadi, M.Sc.<sup>1</sup>, Sara Khademi, Ph.D.<sup>2</sup>, Yazdan Choghazardi, Ph.D.<sup>3</sup>, Rasoul Irajirad, Ph.D.<sup>4</sup>,  
 Mohammad Keshtkar, Ph.D.<sup>5\*</sup>, Alireza Montazerabadi, Ph.D.<sup>1\*</sup>

1. Medical Physics Research Center, Mashhad University of Medical Sciences, Mashhad, Iran

2. Department of Radiology Technology, School of Paramedical Sciences, Mashhad University of Medical Sciences, Mashhad, Iran

3. Department of Medical Physics, Faculty of Medicine, Isfahan University of Medical Sciences, Isfahan, Iran

4. Department of Medical Physics, School of Medicine, Iran University of Medical Sciences, Tehran, Iran

5. Medical Physics and Radiology Department, Faculty of Medicine, Gonabad University of Medical Sciences, Gonabad, Iran

\*Corresponding Addresses: P.O.Box: 9691983879, Medical Physics and Radiology Department, Faculty of Medicine, Gonabad University of Medical Sciences, Gonabad, Iran

P.O.Box: 9177948564, Medical Physics Research Center, Mashhad University of Medical Sciences, Mashhad, Iran

Emails: keshtkar.dmohammad@yahoo.com, montazerabadi@mums.ac.i

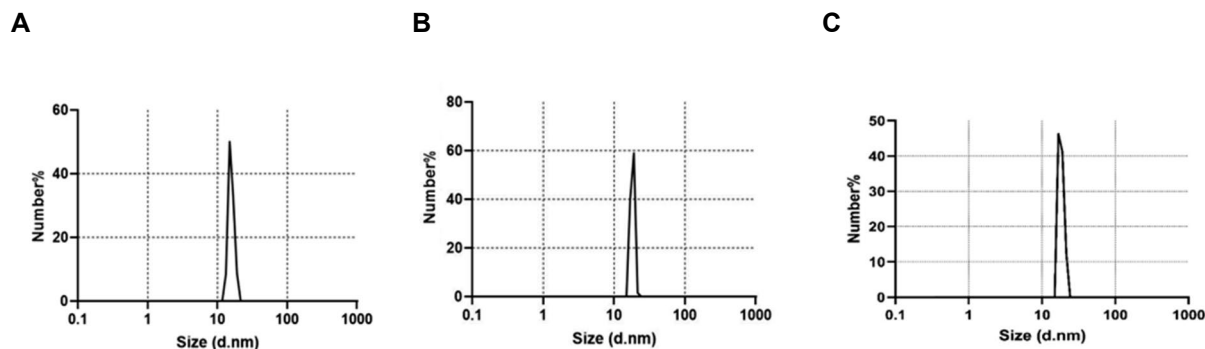

**Fig.S1:** Characterization of targeted and non-targeted Bismuth nanoparticles. **A.** Hydrodynamic size of Bi<sub>2</sub>S<sub>3</sub> @ BSA, **B.** Bi<sub>2</sub>S<sub>3</sub> @ BSA-Triptorelin NPs, and **C.** Bi<sub>2</sub>S<sub>3</sub> @ BSA-Triptorelin NPs after 24 hours incubation in the culture medium. NPs; Nanoparticles.

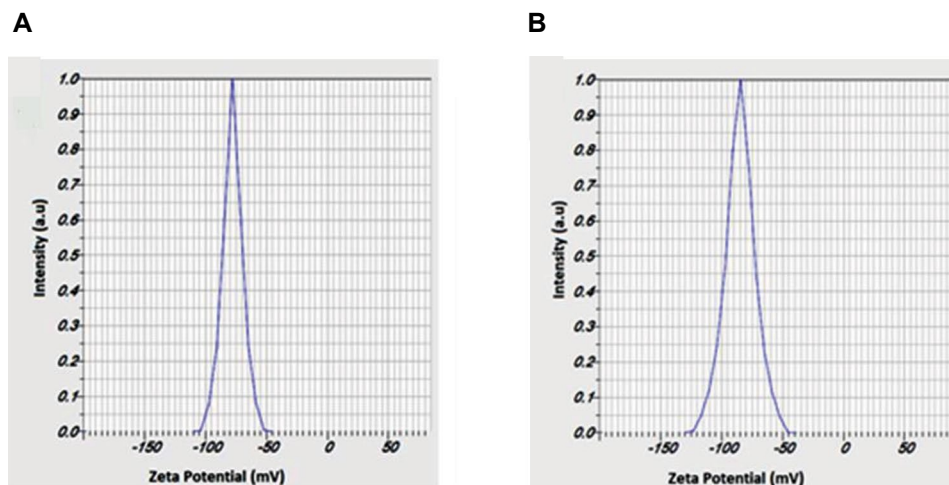

**Fig.S2:** Characterization of targeted and non-targeted Bismuth nanoparticles. **A.** Zeta potential of Bi<sub>2</sub>S<sub>3</sub> @ BSA and **B.** Bi<sub>2</sub>S<sub>3</sub> @ BSA-Triptorelin NPs. NPs; Nanoparticles.

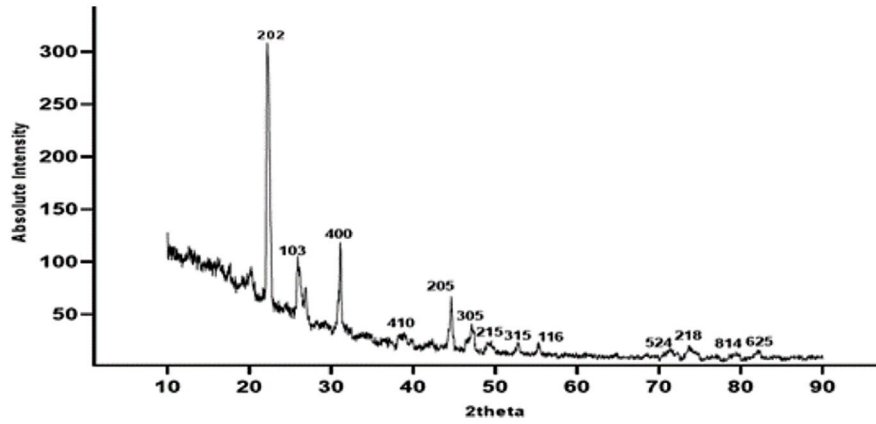

Fig.S3: XRD pattern of Bi<sub>2</sub>S<sub>3</sub> NPs. NPs; Nanoparticles.

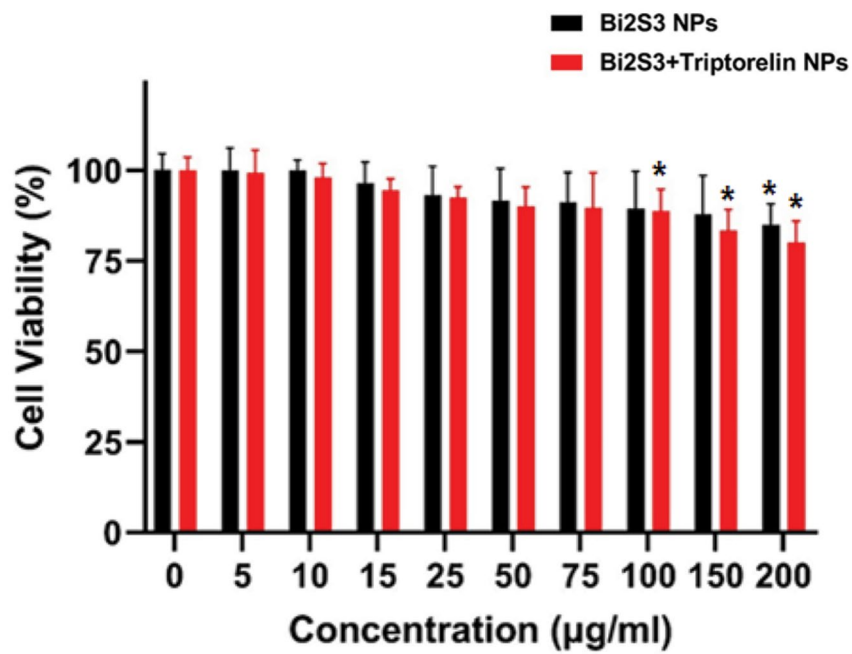

Fig.S4: Viability of MCF-7 cells in the presence of targeted and non-targeted Bi<sub>2</sub>S<sub>3</sub> NPs. NPs; Nanoparticles.
